# Supplementary material for: Knowledge, attitudes, and practices toward tuberculosis among Jordanian university students
Source: Frontiers journal article supplement (doi:10.3389/fpubh.2022.1055037), 2022-11-21
Supplement: Data_Sheet_1.PDF [file Data_Sheet_1.PDF]

## Supplementary material

# **Knowledge, attitudes, and practices toward tuberculosis in Jordanian university students**

Anas H. A. Abu-Humaidan<sup>1\*</sup>, Alaa Tarazi<sup>2</sup>, Yazan Hamadneh<sup>2</sup>, Ahmad Al-leimon<sup>2</sup>, Obada Al-leimon<sup>2</sup>, Mohammad Aljahalin<sup>2</sup>, Fatima M. Ahmad<sup>1</sup>, Dima Awajan<sup>3</sup>, Nader Alaridah<sup>1</sup>

<sup>1</sup> Department of Pathology, Microbiology and Forensic Medicine, School of Medicine, The University of Jordan, Amman 11942, Jordan.

<sup>2</sup> School of Medicine, The University of Jordan, Amman 11942, Jordan

<sup>3</sup> Department of Clinical Pharmacy and Therapeutics, Applied Science Private University, Amman 11931, Jordan

\*Address correspondence to:

Anas Abu-Humaidan M.D. Ph.D.

E-mail: [A.abuhumaidan@ju.edu.jo](mailto:A.abuhumaidan@ju.edu.jo)

Tel. number: +962779227922

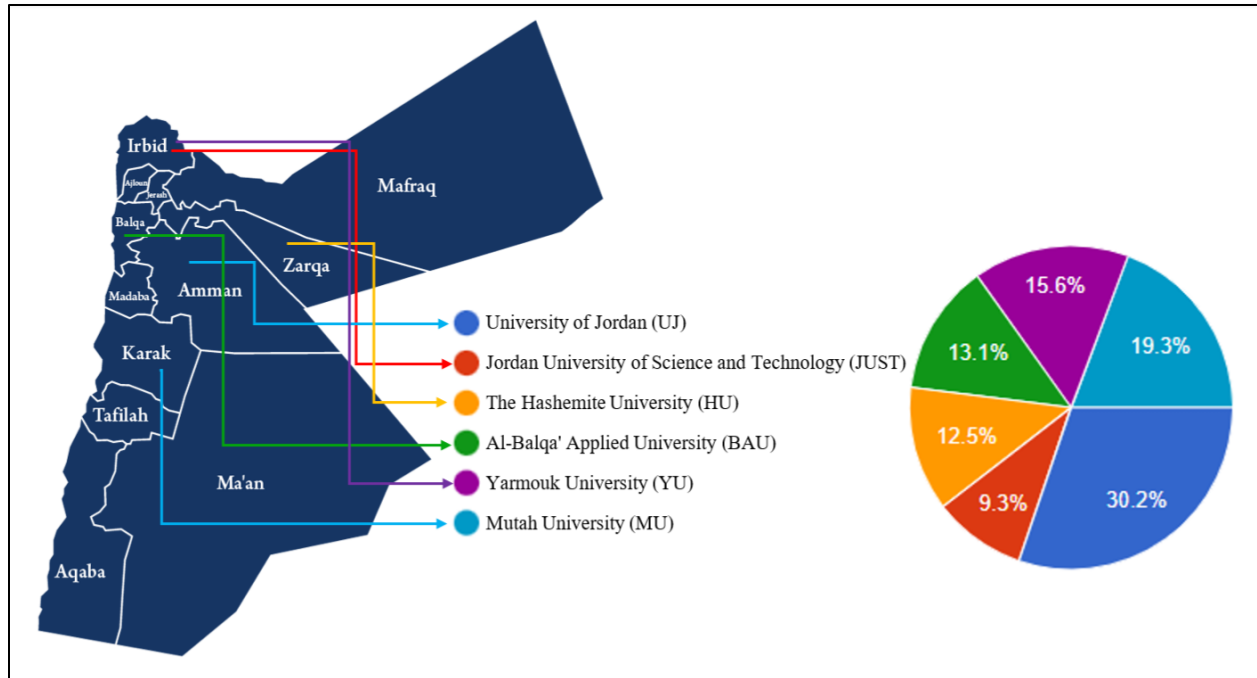

**Supplementary figure 1.** A representation of the percentage of students participating in the survey according to their university (pie chart to the right) and its location in Jordan (map to the left).

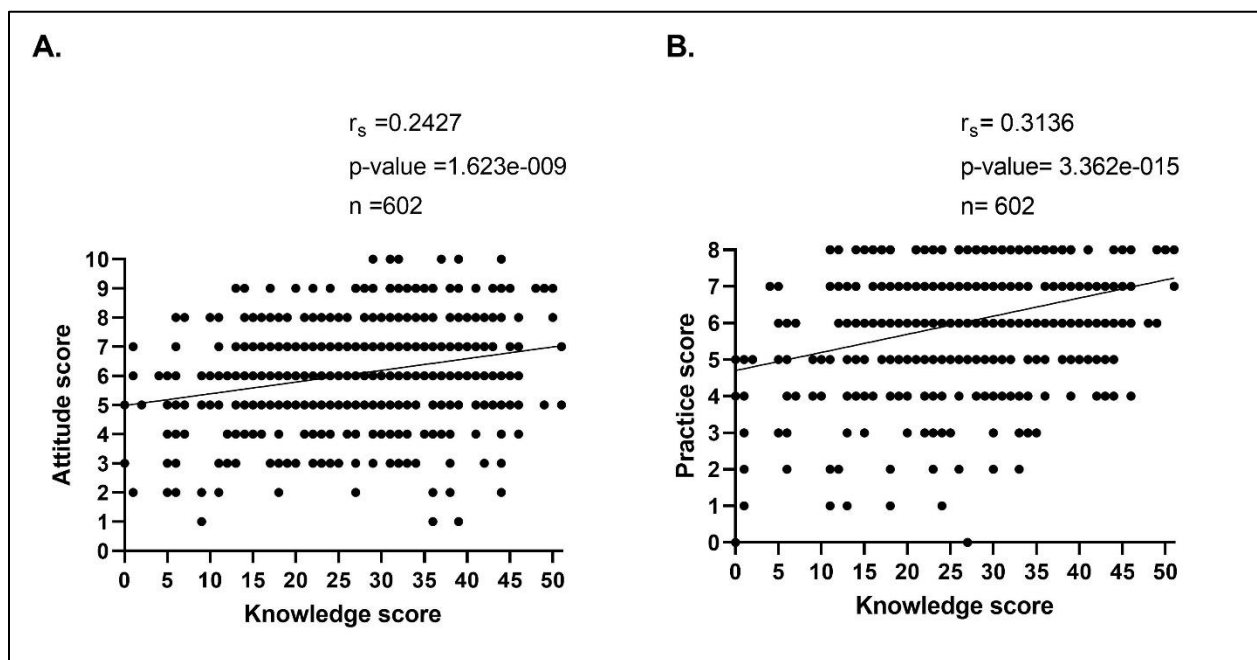

**Supplementary figure 2.** Scatter plots representing the correlation between (A.) knowledge and attitude scores, as well as (B.) knowledge and practice scores. Displayed on the plots are Spearman's correlation coefficient ( $r_s$ ), p-values, and the number of participants ( $n$ ).
