# Supplementary material for: Knowledge, attitudes, and practices toward tuberculosis among Jordanian university students
Source: Frontiers journal article supplement (doi:10.3389/fpubh.2022.1055037), 2022-11-21
Supplement: Data_Sheet_2.pdf [file Data_Sheet_2.pdf]

# Knowledge, attitudes, and practices toward tuberculosis in Jordanian university students

YOU ARE INVITED TO PARTICIPATE IN THIS STUDY WHICH AIMS TO MEASURE THE KNOWLEDGE, ATTITUDES, AND PRACTICES OF UNIVERSITY STUDENTS TOWARDS TUBERCULOSIS. THIS STUDY IS CONDUCTED BY A RESEARCH TEAM FROM THE SCHOOL OF MEDICINE AT THE UNIVERSITY OF JORDAN. YOUR PARTICIPATION IS VOLUNTARY, IF YOU PARTICIPATE IN THIS STUDY THE INFORMATION YOU SHARE WILL BE KEPT COMPLETELY CONFIDENTIAL.

---

\* Required

1. 1. Gender \*

*Mark only one oval.*

- Female
- Male

2. 2. In which field is your specialty? \*

*Mark only one oval.*

- Medical field (medicine, pharmacy, nursing)
- Non-medical field (law, engineering, math, biology, business, ....)

3. In which university do you study? \*

*Mark only one oval.*

- University of Jordan (UJ)
- University of Science and Technology (JUST)
- Hashemite University (HU)
- Al- Balqa' Applied University (BAU)
- Yarmouk University (YU)
- Mu'tah University (MU)

4. Year of study? \*

*Mark only one oval.*

- 1
- 2
- 3
- 4
- 5
- 6

5. Nationality \*

*Mark only one oval.*

- Jordan
- Palastine
- Iraq
- yaman
- UAE (United Arab Emarites)
- KSA (Kingdom of Saudi arabia)
- Egypt
- Kuwait
- Qatar
- Syria
- Other

6. 3.Do you smoke? \*

*Mark only one oval.*

- Yes
- No
- Sometimes

7. Where do you live? \*

*Mark only one oval.*

- countryside or desert
- Cities/Central Urban Areas

8. Do you use hygiene products when you are not at home especially in public places? \*

*Mark only one oval.*

- Yes
- No
- Sometimes

9. Are you convinced that the mask is an appropriate way to prevent infectious diseases that can be transmitted in air? \*

*Mark only one oval.*

- Yes
- No
- Maybe

10. If you had a cough for more than three weeks or if you were coughing up blood in your sputum, what would you do? \*

*Check all that apply.*

- Go to doctor
- Drink herbs
- Take any medicine from pharmacy
- Just Ignore it

11. Where did you first learn about tuberculosis or TB? \*

*Check all that apply.*

- Newspapers and magazines
- TV
- Social media
- Brochures, posters, and other printed materials
- Health workers
- Family, friends, neighbors, and colleagues
- Teachers
- From your study in your college
- I have never heard about it

12. In your opinion, how serious a disease is TB? \*

*Mark only one oval.*

- Very serious
- Somewhat serious
- Not very serious
- I don't know

13-What are the signs and symptoms of TB? \*

*Check all that apply.*

- Cough that last more than 3 weeks
- Coughing up blood
- Severe headache
- Weight loss
- Fever
- Chest pain
- Shortness of breath
- Ongoing fatigue
- Do not know

14. How can a person get TB? \*

*Check all that apply.*

- Through handshakes
- Through the air when the person with TB cough or sneezes
- Through sharing dishes
- Through eating from the same plate
- Through touching items in public spaces (doorknobs, handles in transportation, etc.)
- It is not a contagious disease
- Do not know

15. In your opinion, who can be infected with TB? \*

*Check all that apply.*

- Anybody
- Only poor people
- Only homeless people
- Only alcoholics
- Only drug users
- Only people living with HIV I AIDS
- Only people who have been in prison
- I don't know

16. Can TB be cured? \*

*Mark only one oval.*

- Yes
- No
- Maybe

17. How can someone with TB be cured? \*

*Check all that apply.*

- Herbal remedies
- Home rest without medicine
- Specific drugs given by health center or doctor
- Do not know

18. How long does it take to treat TB? \*

*Mark only one oval.*

- less than 6 Months
- 6 -12 months
- 13-18 months
- 19-24 months
- more than 24 months
- I don't know

19. Does TB treatment have side effects? \*

*Mark only one oval.*

- It doesn't have side effects
- It MAY have minor side effects (e.g., nausea, anorexia, joint pain, orange red urine)
- It MAY have severe side effects (e.g., deafness, vomiting, jaundice, visual impairment)
- I don't know

20. Do you think that there is a relation between TB and bones (EX. osteomyelitis, kyphosis)? (Kyphosis: a curvature of the spine) \*

*Mark only one oval.*

- Yes
- No
- Maybe

21. Do we have vaccines that can protect us against TB? \*

*Mark only one oval.*

- Yes
- No

22. Do you think you can get TB? \*

*Mark only one oval.*

- Yes
- No

23. Who would you talk to about your illness if you had TB? \*

*Check all that apply.*

- Doctor or another medical worker
- Spouse
- Parent
- Child(ren)
- Other family member
- others
- Close friend
- No one

24. If you had symptoms of TB, at what point would you go to the health facility? \*

*Mark only one oval.*

- When treatment on my own does not work > go to (QB)
- When symptoms that look like TB signs last for 3–4 weeks > go to (QB)
- As soon as I realize that my symptoms might be related to TB > go to (QB)
- I would not go to the doctor > go to (QA)

25. QA-If you would not go to the health facility, what is the reason?

*Check all that apply.*

- Not sure where to go
- Cost/Difficulties with transportation/distance to clinic
- Do not trust medical workers
- Do not like attitude of medical workers
- Cannot leave work (overlapping work hours with medical facility working hours)
- Do not want to find out that something is wrong



26. QB-How expensive do you think TB diagnosis and treatment is in Jordan?

*Mark only one oval.*

- It is free of charge
- It is reasonably priced
- It is somewhat/moderately expensive
- It is very expensive
- I don't know

27. How serious a problem do you think TB is in Jordan? \*

*Mark only one oval.*

- Very serious
- Somewhat Serious
- Not serious at all
- I don't know

28. Do you know people who have/had TB? \*

*Mark only one oval.*

- Yes
- No

29. Which statement is closest to your feeling about people with TB disease? \*

*Mark only one oval.*

- “I feel compassion and desire to help.”
- “I feel compassion but I tend to stay away from these people.”
- “It is their problem and I cannot get TB.”
- “I fear them because they may infect me.”
- “I have no particular feeling.”

30. In your community, how is a person who has TB usually regarded/treated? \*

*Check all that apply.*

- Most people reject him or her
- Most people are friendly, but they generally try to avoid him or her
- The community mostly supports and helps him or her

31. Do you think that immunocompromised people are more susceptible to TB? \*

*Mark only one oval.*

- Yes
- No
- I don't know

32. Do you feel well informed about TB? \*

*Mark only one oval.*

- Yes
- No

33. Do you wish you could get more information about TB? \*

*Mark only one oval.*

- Yes
- No

34. Has the Corona pandemic affected your daily habits that can easily have an impact on the transmission of chest diseases? \*

*Mark only one oval.*

- Yes
- No

35. What are the sources of information that you think can most effectively reach people like you with information on TB? (Please choose the three most effective sources.) \*

*Check all that apply.*

- Newspapers and magazines
- Social media
- Radio
- TV
- Billboards
- Brochures, posters and other printed materials
- Health workers
- Family, friends, neighbors and colleagues
- Teachers
